# Supplementary material for: Reconciling the Entomological Hazard and Disease Risk in the Lyme Disease System
Source: PubMed Central journal article supplement (PMC5982087; doi:10.3390/ijerph15051048), 2018-05-22
Supplement: ijerph-15-01048-s001.pdf [file ijerph-15-01048-s001.pdf]

*Supplementary Figures*

## Reconciling the Entomological Hazard and Disease Risk in the Lyme Disease System

Max McClure <sup>1</sup> and Maria Diuk-Wasser <sup>2,\*</sup>

<sup>1</sup> Vagelos College of Physicians & Surgeons, Columbia University, New York City, NY 10032, USA; mam2477@cumc.columbia.edu

<sup>2</sup> Department of Ecology, Evolution, and Environmental Biology, Columbia University, New York City, NY 10027, USA

\* Correspondence: mad2256@columbia.edu;

(a)

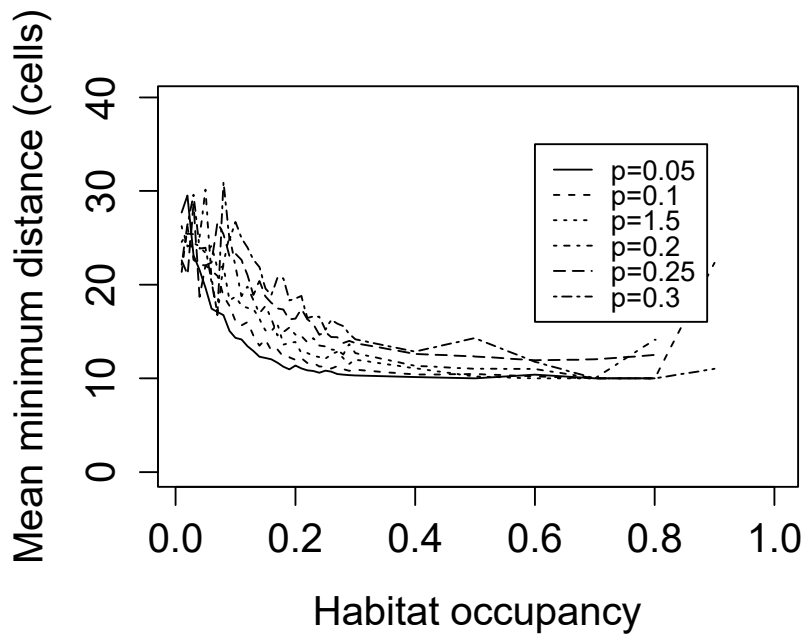

Figure S1. Cont.

(b)

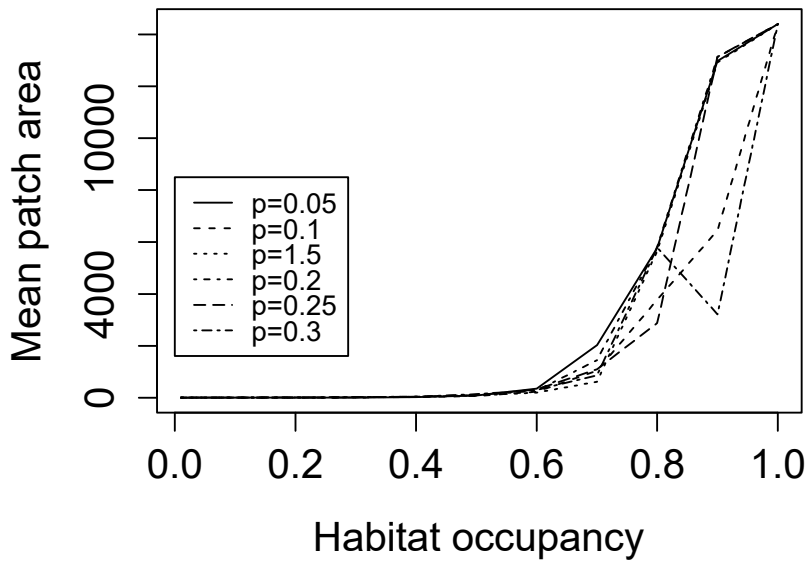

(c)

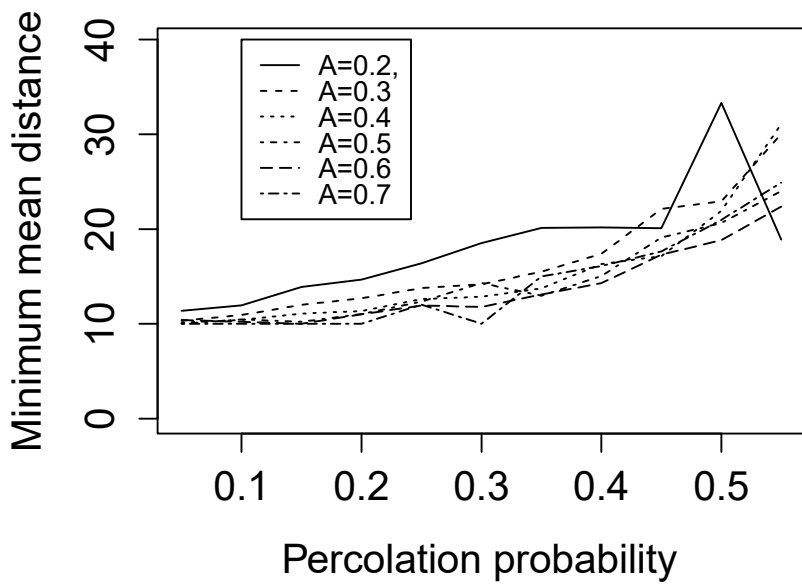

Figure S1. Cont.

(d)

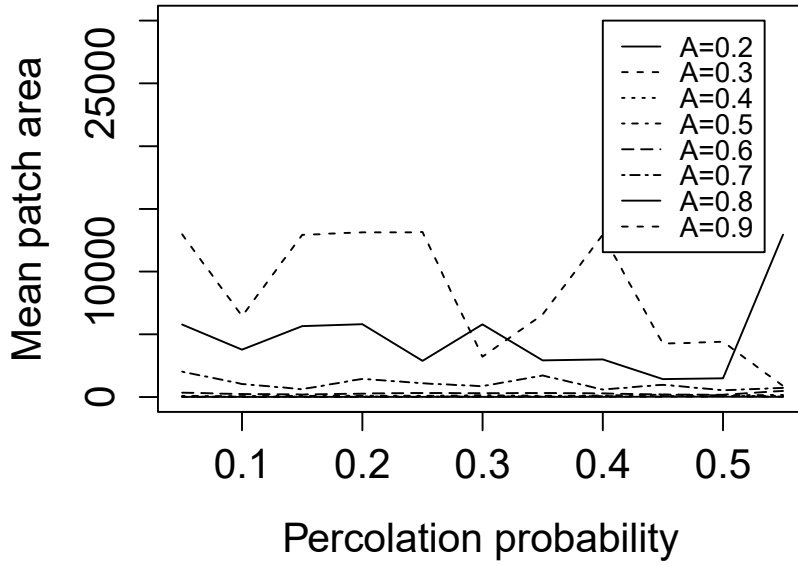

(e)

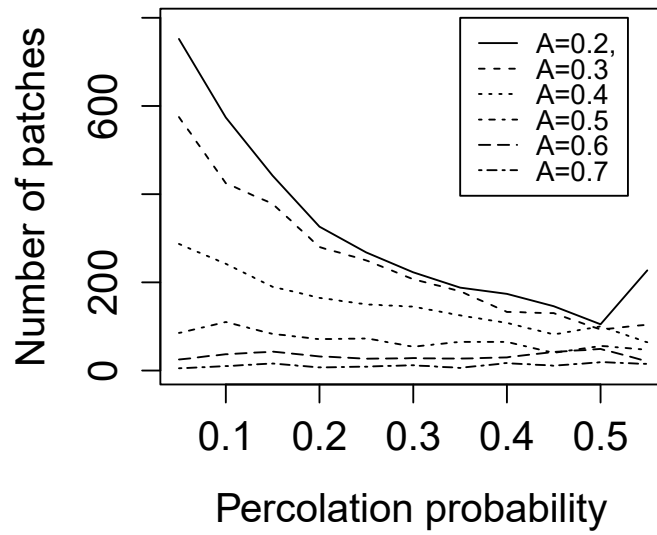

Figure S1. Cont.

(f)

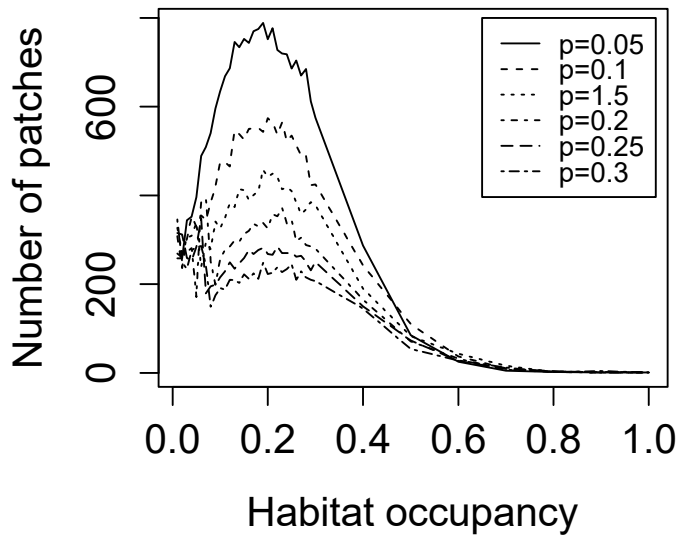

**Figure S1.** Relations between Modified Random Clusters parameters (habitat occupancy and percolation probability) and traditional fragmentation statistics in simulated landscapes. **(a)** Patch isolation as a function of habitat occupancy  $A$ . **(b)** Patch isolation as a function of percolation probability  $p$ . **(c)** Mean patch area as a function of  $A$ . **(d)** Mean patch area as a function of  $p$ . **(e)** Number of patches as a function of  $p$ . **(f)** Number of patches as a function of  $A$ .

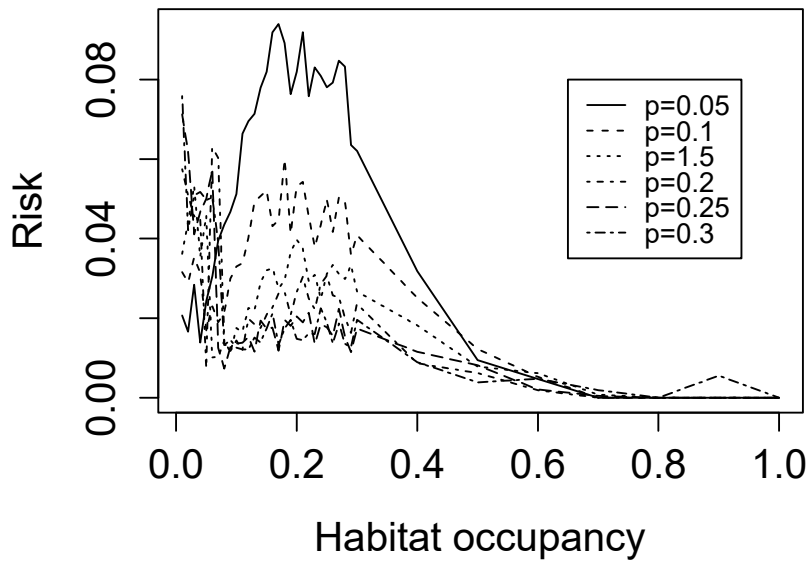

**Figure S2.** Predicted LD risk of simulated landscapes (excluding one-cell forest patches) as a function of habitat occupancy (forest cover). Each curve is evaluated for a landscape with a different percolation probability  $p$ .

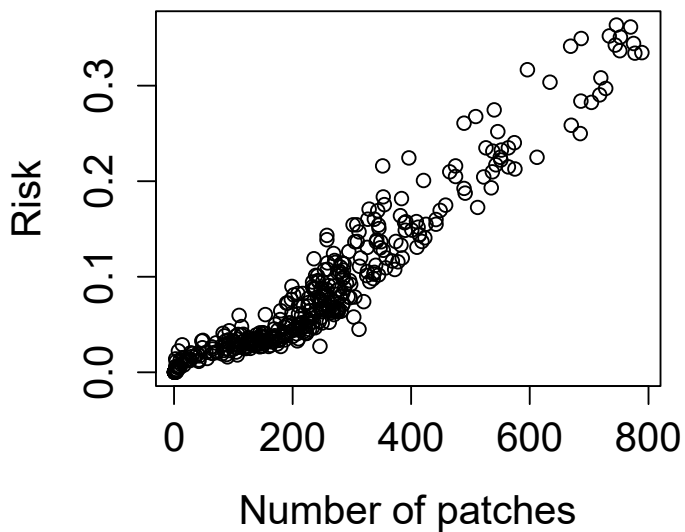

**Figure S3.** Predicted LD risk as a function of number of forest patches.

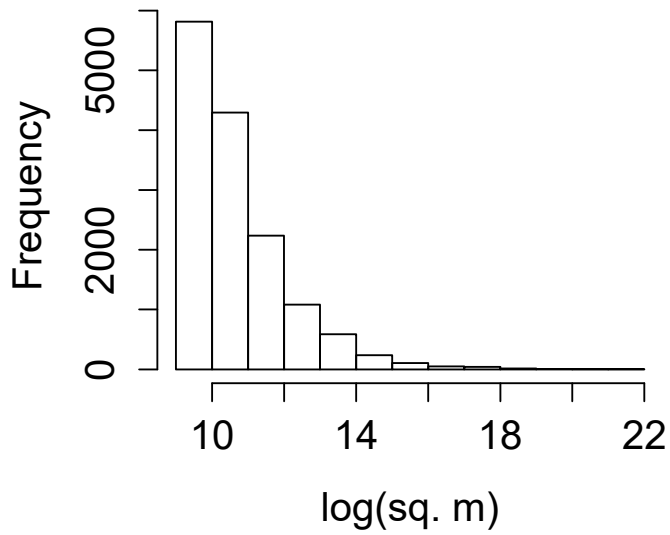

**Figure S4.** Frequency distribution of log-transformed deciduous and mixed forest patch areas.

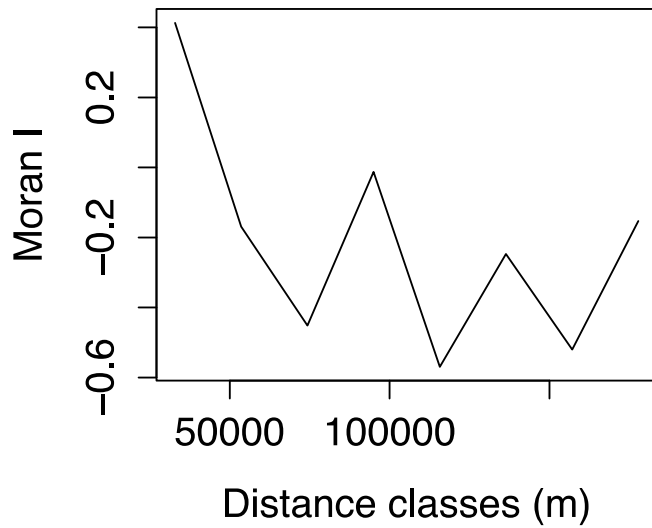

**Figure S5.** Lyme disease incidence (LDI) correlogram. Plot of Moran's I for LDI as a function of distance class within study region.
